# Supplementary material for: Whole Genome Sequencing of the Novel Probiotic Strain Lactiplantibacillus plantarum FCa3L
Source: MDPI journal article supplement (doi:10.3390/microorganisms11051234), 2023-05-07
Supplement: s1 [file s1]

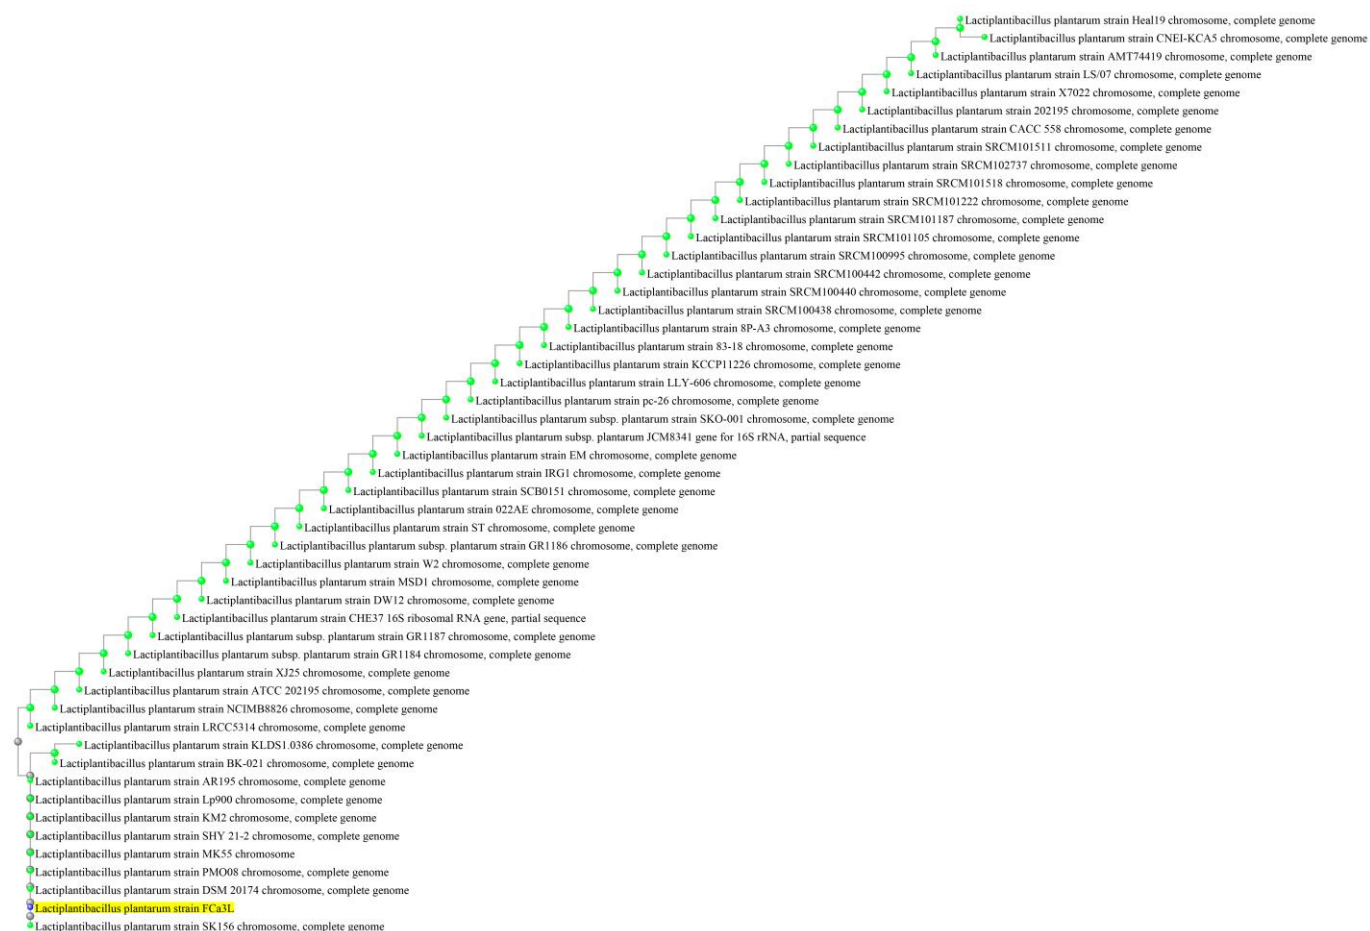

**Figure S1.** The whole genome-based phylogenetic tree of *L. plantarum* FCa3L generated by EMBL-EBI server ([https://www.ebi.ac.uk/Tools/phylogeny/simple\\_phylogeny/](https://www.ebi.ac.uk/Tools/phylogeny/simple_phylogeny/) accessed on) using the whole-genome sequences of the *L. plantarum* species.
